# Supplementary material
Source: PubMed Central journal article supplement (PMC3612896)
Supplement: NIHMS447447-supplement-Supplemental_Information.pdf [file NIHMS447447-supplement-Supplemental_Information.pdf]

## Supplemental Information

### Seeing Mutations in Living Cells

Marina Elez, Andrew W. Murray, Li-Jun Bi, Xian-En Zhang, Ivan Matic, and Miroslav Radman

#### Induction of eGFP-MutL<sup>wt</sup> Expression by Arabinose

Addition of arabinose to growth medium induces the expression of T7 RNA polymerase gene located on the chromosome, which is under control of the arabinose promoter. T7 RNA polymerase gene induction results in eGFP-MutL<sup>wt</sup> induction from T7 RNA polymerase promoter, which is located on plasmid. In the absence of arabinose, the basal level of T7 RNA polymerase gene expression allows production of the eGFP-MutL<sup>wt</sup>, which is sufficient for complementation of chromosomal *mutL* gene inactivation. The overproduction of eGFP-MutL<sup>wt</sup> does not change the number of eGFP-MutL<sup>wt</sup> fluorescent foci (Supplementary Figure 1).

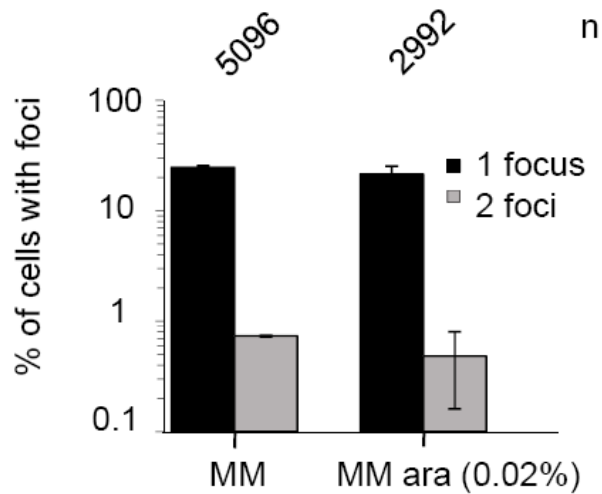

**Figure S1, Related to Figure 2. Frequency of eGFP-MutL<sup>wt</sup> Foci with or without Induction of eGFP-MutL<sup>wt</sup> Expression**

Percentage of *mutL mutH* cells with eGFP-MutL<sup>wt</sup> foci grown in minimal medium (MM) or MM supplemented by 0.02% arabinose (ara). Error bars indicate standard error of the mean. n indicates the number of cells examined.

**Table S1, Related to Figure 2. MutS<sup>wt</sup> and MutL<sup>wt</sup> Fusion Proteins Are Functional**

| Strain           | Phenotype                                   | Frequency of Rif <sup>R</sup> Mutants |
|------------------|---------------------------------------------|---------------------------------------|
| Chromosome       | Plasmid                                     | x10 <sup>-8</sup>                     |
| wild-type        | pBR322                                      | WT 1.8 ± 0.7                          |
| <i>mutL</i>      | peGFP-MutL <sup>wt</sup>                    | WT 1.7 ± 1.0                          |
| <i>mutS</i>      | peGFP-MutS <sup>wt</sup>                    | WT 3.3 ± 1.5                          |
| <i>mutL</i>      | peGFP-MutLK159E                             | MutL <sup>-</sup> 234 ± 125           |
| <i>mutS</i>      | peGFP-MutSF36A                              | MutS <sup>-</sup> 391 ± 57.9          |
| <i>mutL mutH</i> | peGFP-MutL <sup>wt</sup>                    | MutH <sup>-</sup> 208 ± 53.6          |
| <i>mutL mutH</i> | peGFP-MutL <sup>wt</sup> MutH <sup>wt</sup> | WT 1.1 ± 0.5                          |

Mutation frequency was determined from three to six independent cultures grown in minimal medium. Mean and standard errors are indicated. Rif<sup>R</sup>, rifampicin-resistant.

**Table S2. Bacterial Strains**

| Strain  | Genotype                                                     | Source, Reference, or Construction |            |
|---------|--------------------------------------------------------------|------------------------------------|------------|
| MG1655  |                                                              |                                    | Lab stock  |
| FR535   | As GM6494, but <i>mutL</i> ::Tn5                             |                                    | Lab stock  |
| BL21-AI | As BL21, but <i>araB</i> ::T7RNAP-tetA                       |                                    | Invitrogen |
| IB11    | As MG1655, but <i>mutS</i> ::Spec/Strep                      |                                    | Lab stock  |
| KM55    | As AB1157, but <i>mutH</i> ::Cam                             |                                    | [5]        |
| FR680   | As MG1655, but <i>mutD5 zae13</i> ::Tn10                     |                                    | Lab stock  |
| JW0233  | As BW25113, but <i>proB</i> ::Kan                            |                                    | [6]        |
| JW2799  | As BW25113, but <i>mutH</i> ::Kan                            |                                    | [6]        |
| KM52    | As AB1157, but <i>mutL</i> ::Cam                             |                                    | M. Marinus |
| ME001   | As MG1655, but <i>mutL</i> ::Tn5                             | MG1655 X P1 (FR535)                | This work  |
| ME002   | As ME001, but <i>araB</i> ::T7RNAP-tetA                      | ME001 X P1 (BL21-AI)               | This work  |
| ME003   | As ME002, but peGFP-MutL <sup>wt</sup>                       | ME002 X peGFP-MutL <sup>wt</sup>   | This work  |
| ME004   | As ME001, but <i>mutS</i> ::Spec/Strep                       | ME001 X P1 (IB11)                  | This work  |
| ME005   | As ME004, but <i>araB</i> ::T7RNAP-tetA                      | ME004 X P1 (BL21-AI)               | This work  |
| ME006   | As ME005, but peGFP-MutL <sup>wt</sup>                       | ME005 X peGFP-MutL <sup>wt</sup>   | This work  |
| ME007   | As ME003, but <i>mutH</i> ::Cam                              | ME003 X P1 (KM55)                  | This work  |
| ME008   | As ME006, but <i>mutH</i> ::Cam                              | ME006 X P1 (KM55)                  | This work  |
| ME009   | As ME002, but peGFP-MutLK159E                                | ME002 X peGFP-MutLK159E            | This work  |
| ME010   | As ME002, but <i>mutH</i> ::Cam                              | ME002 X P1 (KM55)                  | This work  |
| ME011   | As ME010, but peGFP-MutLK159E                                | ME010 X peGFP-MutLK159E            | This work  |
| ME012   | As IB11, but <i>araB</i> ::T7RNAP-tetA                       | IB11 X P1 (BL21-AI)                | This work  |
| ME013   | As ME012, but peGFP-MutS <sup>wt</sup>                       | ME012 X peGFP-MutS <sup>wt</sup>   | This work  |
| ME014   | As ME012, but peGFP-MutSF36A                                 | ME012 X peGFP-MutSF36A             | This work  |
| ME015   | As MG1655, but <i>mutH</i> ::Kan                             | MG1655 X P1 (JW2799)               | This work  |
| ME016   | As ME015, but <i>araB</i> ::T7RNAP-tetA                      | ME015 X P1 (BL21-AI)               | This work  |
| ME017   | As ME016, but <i>mutS</i> ::Spec/Strep                       | ME016 X P1 (IB11)                  | This work  |
| ME018   | As ME017, but peGFP-MutS <sup>wt</sup>                       | ME017 X peGFP-MutS <sup>wt</sup>   | This work  |
| ME019   | As ME017, but peGFP-MutSF36A                                 | ME017 X peGFP-MutSF36A             | This work  |
| ME020   | As FR680, but <i>proB</i> ::Kan                              | FR680 X P1 (JW0233)                | This work  |
| ME021   | As MG1655, but <i>araB</i> ::T7RNAP-tetA                     | MG1655 X P1 (BL21-AI)              | This work  |
| ME022   | As ME021, but <i>mutL</i> ::Cam                              | ME021 X P1 (KM52)                  | This work  |
| ME023   | As ME022, but peGFP-MutL <sup>wt</sup>                       | ME022 X peGFP-MutL <sup>wt</sup>   | This work  |
| ME024   | As ME023 but, <i>mutD5 zae13</i> ::Tn10<br><i>proB</i> ::Kan | ME023 X P1 (ME020)                 | This work  |

**Table S3. Plasmids**

| Plasmid                  | Source, Reference, or Construction |
|--------------------------|------------------------------------|
| pWY1076                  | [2]                                |
| pWY1170                  | [2]                                |
| peGFP-MutL <sup>wt</sup> | This work                          |
| peGFP-MutLK159E          | This work                          |
| peGFP-MutS <sup>wt</sup> | [1]                                |
| peGFP-MutSF36A           | This work                          |

**Table S4, Related to Figure 4. *mutD5* Mutator Effect in *mutL* Cells Producing eGFP-MutL<sup>wt</sup>**

| Strain            |                          | Frequency of Rif <sup>R</sup> mutants |
|-------------------|--------------------------|---------------------------------------|
|                   |                          | x10 <sup>-8</sup>                     |
| wild-type         | pBR322                   | 1.8 ± 0.7                             |
| <i>mutL mutH</i>  | peGFP-MutL <sup>wt</sup> | 255 ± 42.9                            |
| <i>mutL mutD5</i> | peGFP-MutL <sup>wt</sup> | 578 ± 185                             |

Mutation frequency was determined from three to six independent cultures. Mean and standard errors are indicated. Rif<sup>R</sup>, rifampicin-resistant.

## Supplemental Experimental Procedures

### Fusion of Fluorescent Reporters to Mismatch Repair Proteins

Plasmids peGFP-MutS<sup>wt</sup> and peGFP-MutL<sup>wt</sup> were constructed by *Li-Jun Bi & al.*, as described previously for MutS [1]. Briefly, pET-32a plasmid (*Novagen*) was modified by restriction digestion and ligation to include DNA fragments encoding MutS or MutL, a (Ser-Gly)<sub>6</sub> linker, and the eGFP (enhanced Green Fluorescent Protein), generating peGFP-MutS<sup>wt</sup> and peGFP-MutL<sup>wt</sup>, respectively. eGFP-tagged MutS and MutL cloned on pET-32a are expressed from LacI repressible T7 RNA polymerase promoter.

peGFP-MutS<sup>wt</sup> and peGFP-MutL<sup>wt</sup> were modified to encode mutant versions of MutL or MutS fused to eGFP as described below. The plasmid expressing MutLK159E mutant (deficient for DNA binding and ATP hydrolysis) fused to eGFP, was made using the plasmid pWY1076 [2] expressing the MutLK159E. Briefly, the fragment encoding part of the MutLK159E was digested with *HindIII* and *SpeI*, and cloned into peGFP-MutL<sup>wt</sup> to yield peGFP-MutLK159E. The plasmid expressing MutSF36A mutant (deficient for mismatch binding) fused to eGFP was made by using the primers 5'-CCGAATTCATGAGTGCAATAGAAAATTTTC-3' and 5'-CGGTAATGCCAATGCCCGGTT-3' spanning MutS N terminal and including *EcoRI* and *BsmI* restriction sites at N and C termini, respectively. With those primers, the fragment encoding part of the MutSF36A mutant was amplified by PCR from template pWY1170 [2]. PCR product was digested by *EcoRI* and *BsmI* and cloned into vector peGFP-MutS<sup>wt</sup> to yield peGFP-MutF36A.

### Strain Construction and Media

Strains and plasmids are listed in Supplementary Tables 2 and 3. All strains were derived from wild-type sequenced *E. coli* MG1655 by P1 transduction and transformation. Strain genotypes were verified by testing the UV resistance, capacity to generate mutations conferring resistance to rifampicin, or ability to use arabinose in McConkey plates supplemented by arabinose. Cells were grown on standard M9 minimal medium [3] supplemented by 2 mM MgSO<sub>4</sub>, 0.003% vitamin B1, 0.001% uracile, 0.2 % casamino acids, 0.01 % glycerol and ampicillin (100 µg/ml).

### Microscopy

Supplemented minimal medium (see above) overnight cultures of the strains expressing fluorescent reporter(s) were diluted 250-fold and grown to early exponential phase. Cells were concentrated and spread on agarose supplemented by minimal medium, in a cavity slide to obtain a cell monolayer, as described previously [4]. The slide was mounted on Metamorph software (Universal Imaging) driven temperature controlled (Life Imaging Services) Zeiss 200M (Zeiss) inverted microscope. Images were recorded at 100-fold magnification using CoolSNAP HQ camera (Princeton Instruments), in phase contrast and in fluorescence [50% neutral density filter on a 100 W Fluo-Arc Hg-vapor lamp (Zeiss) regulated to 100% power] at wavelength of 500 nm during 20 seconds of exposure time. For time-lapse microscopy excitation was limited to 50% of output of 100 W Fluo-Arc Hg-vapor lamp and cells were exposed during 6 seconds to avoid photo-bleaching.

All experiments were repeated at least 3 times. Data from all experiments are plotted.

## **Image Analysis**

For all foci, the region delimiting each focus and one control region in the cell, were defined using Metamorph region tool. Fluorescence of the control and focus regions were measured for each cell. Focus fluorescence is calculated by subtracting the fluorescence of the control region from the maximal pixel intensity of the focus region. The fluorescence background of the agarose was recorded for each image. Cell fluorescence was determined by subtracting the average fluorescence of the agarose from the average cell fluorescence.

## **Spontaneous Mutation Frequency Assay**

Strains expressing fluorescent reporter(s) fused to wild-type or mutant MutS and MutL were grown overnight in supplemented minimal medium (see above). The overnight cultures were then diluted  $10^7$ -fold and grown to saturation. Dilutions of overnight cultures were plated on selective medium (LB containing 100  $\mu\text{g/ml}$  rifampicin and 100  $\mu\text{g/ml}$  ampicillin) to select rifampicin-resistant ( $\text{Rif}^{\text{R}}$ ) colonies and on LB (containing 100  $\mu\text{g/ml}$  ampicillin) to determine the total number of colony forming units. Colonies were scored after 24h of incubation at  $37^\circ\text{C}$ . The average mutation frequency of each strain was determined from three to six independent experiments.

## **Estimating the Mutation Frequency**

We need to go from a measured number of eGFP-MutL foci per cell to an estimate of the mutation frequency per base pair per generation. If each cell had exactly one copy of the genome, this would be a simple calculation, but we must deal with three complexities: cells at different stages of the cell cycle have different numbers of genomes, rapidly growing *E. coli* are born with partially replicated genomes, and, in an exponentially growing population, younger cells are more frequent than older ones.

To deal with the first two problems, we used the measured cell division time of 40 minutes and two pieces of information about the *E. coli* cell division cycle: it takes 40 minutes to replicate the chromosome and there is a minimum interval of 20 minutes between the end of replication and cell division. Using this information we conclude that the replication forks in a newly born cell must be at least half way to the terminus. Thus these cells already have 1.5 genomes (0.5 in single copy + 0.5 in two copies). From birth until twenty minutes, the forks move linearly until this round of replication terminates, meaning that the DNA content of the cell rises linearly from 1.5 to 2 genomes over this period. At twenty minutes, one round of replication finishes and the next starts, with the DNA content increasing twice as rapidly since there are now four forks instead of two. This means that over the second half of the cell cycle, the DNA content increases linearly from 2 to 3 genomes.

The last problem is that cell ages are distributed non-uniformly. The standard age distribution for exponentially growing cells is  $N(x) = 2^{(1-x)}$  where  $N$  is the number of cells of age  $x$  and  $x$  varies from 0 (newly born cells) to 1 (cells about to divide). To find the average number of genomes we

compute the number of genomes at each point of the cell cycle and multiply it by the fraction of cells that are at each point in the cell cycle. This exercise gives a mean number of genomes per cell of 2.0. To calculate the genome wide mutation rate, we use the following formula:

Genomic mutation rate = eGFP-MutL focus frequency/(Mean Genome Number × Genome Length)

Genomic mutation rate =  $0.0057 / (2.0 \times 4.5 \times 10^6) = 6.3 \times 10^{-10}$ .

### Author Contributions

M.R., I.M and M.E. conceived the experiments. M.E. performed the experiments. M.R., I.M, A.M and M.E. analyzed results, interpreted results, and wrote the paper. L.B and X.Z. constructed the plasmids peGFP-MutL<sup>wt</sup> and eGFP-MutS<sup>wt</sup>.

### Supplemental References

1. Bi, L.J., Zhou, Y.F., Zhang, X.E., Deng, J.Y., Wen, J.K., and Zhang, Z.P. (2005). Construction and characterization of different MutS fusion proteins as recognition elements of DNA chip for detection of DNA mutations. *Biosens Bioelectron* 21, 135-144.
2. Junop, M.S., Yang, W., Funchain, P., Clendenin, W., and Miller, J.H. (2003). In vitro and in vivo studies of MutS, MutL and MutH mutants: correlation of mismatch repair and DNA recombination. *DNA Repair (Amst)* 2, 387-405.
3. Miller, J.H. (1992). *A Short Course in Bacterial Genetics* (NY: Cold Spring Harbor Press: Cold Spring Harbor).
4. Stewart, E.J., Madden, R., Paul, G., and Taddei, F. (2005). Aging and death in an organism that reproduces by morphologically symmetric division. *PLoS Biol* 3, e45.
5. Loh, T., Murphy, K.C., and Marinus, M.G. (2001). Mutational analysis of the MutH protein from *Escherichia coli*. *J Biol Chem* 276, 12113-12119.
6. Baba, T., Ara, T., Hasegawa, M., Takai, Y., Okumura, Y., Baba, M., Datsenko, K.A., Tomita, M., Wanner, B.L., and Mori, H. (2006). Construction of *Escherichia coli* K-12 in-frame, single-gene knockout mutants: the Keio collection. *Mol Syst Biol* 2, 2006 0008.
